# Supplementary material for: Anion exchange nanofiber materials activated by daylight with a dual antibacterial effect
Source: Royal Society of Chemistry journal article supplement (doi:10.1039/c4pp00157e), 2014-06-26
Supplement: c4pp00157e1.pdf [file c4pp00157e1.pdf]

## Electronic Supplementary Information.

### Anion Exchange Nanofiber Materials Activated by Daylight with a Dual Antibacterial Effect†

L. Plíštil,<sup>ab</sup> P. Henke,<sup>a</sup> P. Kubát,<sup>c</sup> and J. Mosinger\*<sup>ad</sup>

<sup>a</sup> Faculty of Sciences, Charles University in Prague, Hlavova 2030, 128 43 Prague 2, Czech Republic, phone: +420 221 951 255, e-mail: mosinger@natur.cuni.cz

<sup>b</sup> Center of Applied Bioimplantology, Královské Vinohrady University Hospital, Šrobárova 1150/50, 100 34, Prague 10, Czech Republic.

<sup>c</sup> J. Heyrovský Institute of Physical Chemistry, v.v.i., Academy of Sciences of the Czech Republic, Dolejškova 3, 182 23 Prague 8, Czech Republic.

<sup>d</sup> Institute of Inorganic Chemistry, v.v.i., Academy of Sciences of the Czech Republic, 250 68 Řež, Czech Republic.

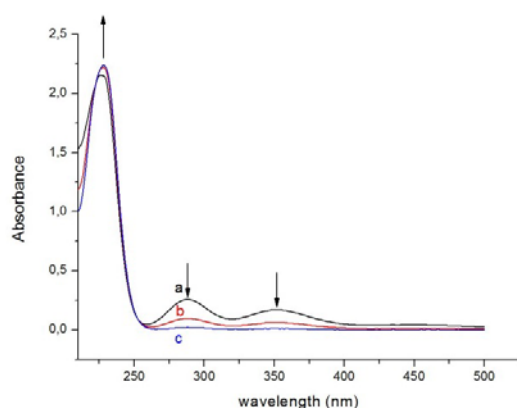

**Figure S1.** The time course of absorption spectra of 64 μM I<sub>3</sub><sup>-</sup> in 30 mL H<sub>2</sub>O after 0 (a), 30 (b), and 60 (c) min of immersion in **AE** (6 cm<sup>2</sup>, 4.0 mmol/g) saturated with I<sup>-</sup> ions; the arrows indicate absorption changes.

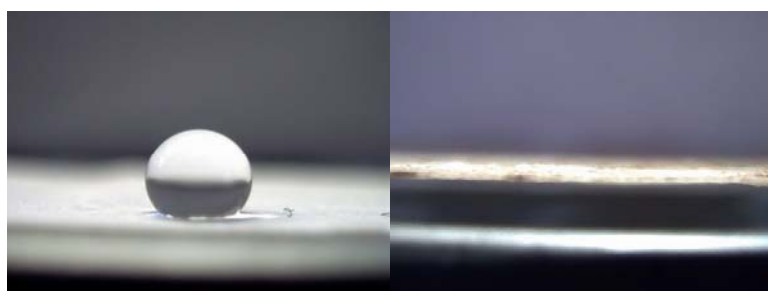

**Figure S2.** ACA measurement of samples **1** (left, 130°), **2**, and **3** (right,  $\leq 5^\circ$ ).

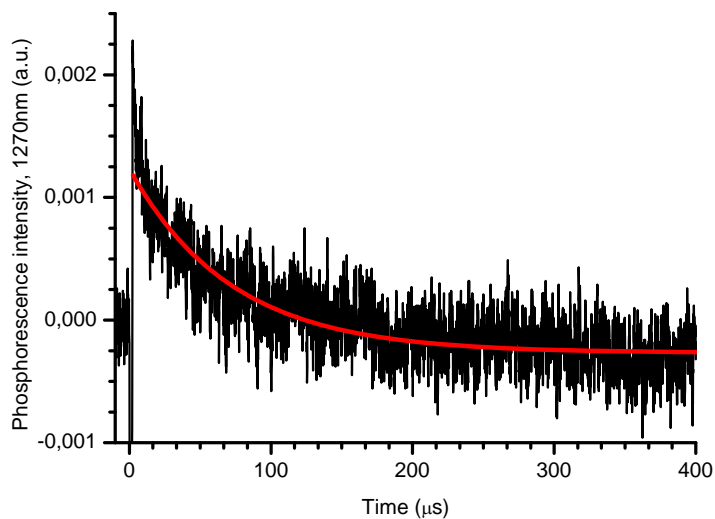

**Figure S3** Time-resolved phosphorescence of  $O_2(^1\Delta_g)$  at 1,270 nm after 308 nm pulsed laser excitation in air-saturated  $D_2O$  for **TPPS-AE** (TPPS/IES = 0.01).

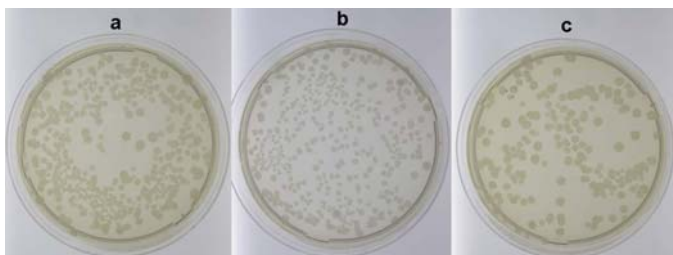

**Figure S4.** Post-irradiation effect. *E. coli* colonies on agar plates inoculated from the surface of **TPPS-AE** (a), **I-AE** (b), and **I-TPPS-AE** (c) first illuminated by a solar simulator (400 W, 15 min) and then inoculated with *E. coli* and stored in the dark for 1 h.
